# Supplementary material
Source: MDPI journal article supplement (https://www.mdpi.com/2077-1312/10/8/1080)
Supplement: s1 [file s1 › jmse-1842823-supplementary.pdf]

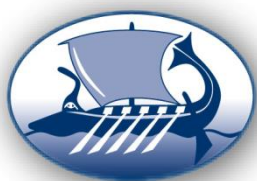

**HELLENIC CENTRE FOR MARINE RESEARCH**  
**(www.hcmr.gr)**

*This survey was designed by the research team of Ecology & Ecosystem Management, Institute of Marine Biology, Biotechnology & Aquaculture (IMBBC), Hellenic Centre for Marine Research (HCMR), in order to get information about your diving activity and the extent to which you would like to use artificial reefs in Cretan waters. Please answer all questions to the best of your ability. Your responses will be confidential; your name will not be identified with your answers.*

1. Since this time last year, on how many DAYS did you go SCUBA diving?

- ☐ 0-9      ☐ 10-19      ☐ 20-29      ☐ 30-39  
☐ 40-49      ☐ 50-59      ☐ > 60

2. How many years have you been certified as a SCUBA diver?

- ☐ < 2      ☐ 2-5      ☐ 6-10  
☐ 11-15      ☐ 16-20      ☐ > 20

3. Where did you get your certification? (Please check all that apply)

- ☐ PADI  
☐ CMAS  
☐ ANDI  
☐ Other (Please specify): .....

4. What is your highest level of certification? (Please check only one answer)

- ☐ Open water  
☐ Advanced open water  
☐ Dive master  
☐ Dive instructor  
☐ Specialty (Please specify): .....

5. Compared to your other outdoor recreation activities (golf, tennis, fishing, camping, etc.), would you rate SCUBA diving as: (Please check only one answer)

- ☐ your most important outdoor activity  
☐ your second most important outdoor activity  
☐ your third most important outdoor activity  
☐ only one of many outdoor activities

6. In which of the following diving activities did you participate most often over the previous twelve months? *(Please check one answer only)*

- ☐ Underwater photography
- ☐ Marine life identification
- ☐ Cave diving
- ☐ Wreck diving
- ☐ Spear fishing
- ☐ Decompression/NITROX diving
- ☐ Night diving
- ☐ Other (Please specify): .....

7. What type of group do you dive with most often? *(Please check only one answer)*

- ☐ Friends
- ☐ Family
- ☐ Family & friends
- ☐ Diving club
- ☐ Friends & diving club
- ☐ Family & diving club
- ☐ Friends, family & diving club

8. Below is a list of reasons why people dive. Please circle the number that indicates how important each of them is for you.

|                                            | Not<br>important | A little<br>important | Rather<br>important | Important | Very<br>important |
|--------------------------------------------|------------------|-----------------------|---------------------|-----------|-------------------|
| For family recreation                      | 1                | 2                     | 3                   | 4         | 5                 |
| To learn more about the marine environment | 1                | 2                     | 3                   | 4         | 5                 |
| To look at fish and other aquatic life     | 1                | 2                     | 3                   | 4         | 5                 |
| To experience adventure and excitement     | 1                | 2                     | 3                   | 4         | 5                 |
| To identify marine organisms               | 1                | 2                     | 3                   | 4         | 5                 |
| To experience underwater tranquillity      | 1                | 2                     | 3                   | 4         | 5                 |
| To be with friends                         | 1                | 2                     | 3                   | 4         | 5                 |
| For the exercise                           | 1                | 2                     | 3                   | 4         | 5                 |
| To develop my diving skills and abilities  | 1                | 2                     | 3                   | 4         | 5                 |

9. At what water depth range do you prefer to dive? *(Please check only one answer)*

- ☐ less than 10m
- ☐ between 10 and 15m
- ☐ between 15 and 20m
- ☐ between 20 and 25m
- ☐ between 25 and 30m
- ☐ more than 30m

10. Please rate the importance of the listed marine life to your diving experiences.

|                                                | Not<br>important | A little<br>important | Rather<br>important | Important | Very<br>important |
|------------------------------------------------|------------------|-----------------------|---------------------|-----------|-------------------|
| Large fish ( <i>e.g., groupers</i> )           | 1                | 2                     | 3                   | 4         | 5                 |
| Small fish ( <i>e.g., gobies</i> )             | 1                | 2                     | 3                   | 4         | 5                 |
| Corals, sponges, shells                        | 1                | 2                     | 3                   | 4         | 5                 |
| Marine worms                                   | 1                | 2                     | 3                   | 4         | 5                 |
| Crustaceans ( <i>e.g., shrimps, lobsters</i> ) | 1                | 2                     | 3                   | 4         | 5                 |
| Others (Please specify): .....                 | 1                | 2                     | 3                   | 4         | 5                 |

11. Would you like to use, while diving, an illustrated waterproof guide for the direct identification of the most common local marine animals and plants?

☐ Yes      ☐ No

12. Of your total number of dive trips in the previous 3 years, on how many trips you have visited sites with artificial reefs (*this includes materials deployed as concrete bottom reefs, floating aggregating devices, wrecks, etc.*)?

a) No of trips: .....

b)                      Type                      of                      artificial                      reefs                      (Please specify): .....

13. Suppose HCMR were to develop a new artificial reef in the area you dive most often. Which types of materials and structures would you prefer most for future artificial reefs? (*Please check one answer only*)

☐ Small boats

☐ Blocks made of concrete

☐ Large Naval ships

☐ Simulated natural rock made from concrete

☐ Other

(please specify): .....

14. When local authorities develop and manage an underwater park with artificial reefs, they should consider the following aspects: (*Please complete this sentence*)

.....

.....

.....

.....

.....

.....

***Contact information:***

Dr. C. Dounas, HCMR Research Director,  
address: P.O. Box 2214, 71003 Heraklion, Crete, GREECE;  
e-mail: [kdounas@hcmr.gr](mailto:kdounas@hcmr.gr)
